# Supplementary material for: Testing the Empathizing–Systemizing theory of sex differences and the Extreme Male Brain theory of autism in half a million people
Source: PubMed Central journal article supplement (PMC6275492; doi:10.1073/pnas.1811032115), 2018-11-12
Supplement: pnas.1811032115.sapp.pdf [file pnas.1811032115.sapp.pdf]

## Supplemental Information Appendix

### Development of the EQ-10, SQ-R-10, and SPQ-10

Development of the short version of the three measures was carried out independently of autism. Specifically, for all three measures, short versions were developed using scores from individuals without an autism diagnosis.

**EQ-10.** Prior psychometric analysis has shown that empathy can be measured along a single dimension with the 60-item EQ (1). Wakabayashi et al. (2) developed a brief 22-item version of the EQ. There are four answer options for each item of the EQ: ‘strongly agree’, ‘slightly agree’, ‘slightly disagree’, and ‘strongly disagree’. For positively poled items, participants are given 2 points for a ‘strongly agree’ response, one point for a ‘slightly agree’ response, and zero points for ‘slightly disagree’ and ‘strongly disagree’ responses. This point system is flipped for negatively poled items. To develop the 10-item version of the EQ, we selected the best derived items by calculating the discrimination index (DI) across the 22 items in a sample of 1,494 (747 males and 747 females) who completed the EQ at [www.cambridgepsychology.com](http://www.cambridgepsychology.com). These individuals did not have a diagnosis of autism. Specifically, to calculate the DI, we first calculated the frequency distribution of the total EQ scores in the sample. We split the sample into two groups based on the sample’s frequency description (high EQ scores [scores of 48 and above] and low EQ scores [scores of 47 and below]). Then for each item, we subtracted the proportion of participants who scored a 1 or 2 in the high EQ group from the proportion of the participants who scored a 1 or 2 in the low EQ group. Good items on a measure are indicated by a discrimination index of 0.3 to 0.7. Based on the DI, the top 10-items naturally consisted of 5 positively poled items and 5 negatively

poled items. The DI for these items are presented in **Table S11** and the correlations between the brief and long measures of the EQ are presented in **Table S12**.

**SQ-R-10.** Prior psychometric research has shown that the 75-item SQ-R captures a single dimension of systemizing and developed a 44-item gender-neutral version of the SQ-R (3). There are four answer options for each item of the SQ-R: ‘strongly agree’, ‘slightly agree’, ‘slightly disagree’, and ‘strongly disagree’. For positively poled items, participants are given 2 points for a ‘strongly agree’ response, one point for a ‘slightly agree’ response, and zero points for ‘slightly disagree’ and ‘strongly disagree’ responses. This point system is flipped for negatively poled items. To develop a brief 10-item version of the SQ-R we calculated the discrimination index (DI) across the 44 items in a sample of 1,392 typical adults (696 males and 696 females) who completed the SQ-R at [www.cambridgepsychology.com](http://www.cambridgepsychology.com). Specifically, to calculate the DI, we first calculated the frequency distribution of the total SQ-R scores in the sample. We split the sample into two groups based on the sample’s frequency description (high SQ-R scores [scores of 58 and above] and low SQ-R scores [scores of 57 and below]). Then for each item, we subtracted the proportion of participants who scored a 1 or 2 in the high SQ-R group from the proportion of the participants who scored a 1 or 2 in the low SQ-R group. We then selected the top SQ-R items based on the DI, which consisted of 7 positively poled and 3 negatively poled items. The DI for these items are presented in **Table S13** and the correlations between the brief and long measures of the SQ are presented in **Table S14**.

**SPQ-10.** The 92-item SPQ measures hyper- and hypo-sensitivity across five subscales: vision, hearing, touch, smell, and taste. Principal component analyses showed that the short 35-

item SPQ indicated that a single dimension consistently assesses sensory hypersensitivity across the five subscales (4). There are four answer options for each item of the SPQ: ‘strongly agree’, ‘agree’, ‘disagree’, and ‘strongly disagree’. For positively poled items, participants are given 3 points for a ‘strongly agree’ response, 2 points for an ‘agree’ response, 1 point for a ‘disagree’ response’ and zero points for ‘strongly disagree’ response. This point system is flipped for negatively poled items. To develop a brief 10-item version of the SPQ we calculated the discrimination index (DI) across the 35 items in a sample of 428 typical adults (214 males and 214 females) who completed the SPQ at [www.cambridgepsychology.com](http://www.cambridgepsychology.com). Specifically, to calculate the DI, we first calculated the frequency distribution of the total 35-item SPQ scores in the sample. We split the sample into two groups based on the sample’s frequency description (high SPQ scores [scores of 44 and above] and low SPQ scores [scores of 43 and below]). Then for each item, we subtracted the proportion of participants who scored a 2 or 3 in the high SPQ group from the proportion of the participants who scored a 2 or 3 in the low SPQ group. We selected the two items with the highest DI for each of the five subscales. For the vision subscale, we replaced item 33 (DI = .37; “I notice the flickering of a desktop computer even when it is working properly”) with item 74 (DI = .33; If I look at a pile of blue sweaters in a shop that are meant to be identical, I would be able to see differences between them) since the former has been outdated with technological advances and retina desktop screens. The DI for these items are presented in Table S5 and the correlations between the brief and long measures of the SPQ are presented in Table S6. For consistency with the scoring options in the EQ-10 and SQ-R-10, for the SPQ-10 we changed the ‘agree’ option to ‘slightly agree’ and the ‘disagree’ option to ‘slightly disagree’. We also constructed the 10-item SPQ so that high scores indicated higher sensory sensitivity. DI is provided in **Table S15**, and correlation between the long and short version is provided in **Table S16**. **Tables**

**S17 – S19** provides the EQ-10, the SQ-10, and the SPQ-10. The AQ-10 is reported in **Table S20**  
(5)

## References

1. Allison C, Baron-Cohen S, Wheelwright SJ, Stone MH, Muncer SJ (2011) Psychometric analysis of the Empathy Quotient (EQ). *Pers Individ Dif* 51(7):829–835.
2. Wakabayashi A, et al. (2006) Development of short forms of the Empathy Quotient (EQ-Short) and the Systemizing Quotient (SQ-Short). *Pers Individ Dif* 41(5):929–940.
3. Allison C, Baron-Cohen S, Stone MH, Muncer SJ (2015) Rasch modeling and confirmatory factor analysis of the systemizing quotient-revised (SQ-R) scale. *Span J Psychol* 18:E16.
4. Tavassoli T, Hoekstra RA, Baron-Cohen S (2014) The Sensory Perception Quotient (SPQ): development and validation of a new sensory questionnaire for adults with and without autism. *Mol Autism* 5(1):29.
5. Allison C, Auyeung B, Baron-Cohen S, Bolton PF, Brayne C (2012) Toward brief “Red Flags” for autism screening: The Short Autism Spectrum Quotient and the Short Quantitative Checklist for Autism in toddlers in 1,000 cases and 3,000 controls [corrected]. *J Am Acad Child Adolesc Psychiatry* 51(2):202–212.e7.

### Supplementary Figure 1

**Fig. S1. Smoothed density plots of scores on the AQ-10, SQ-10, EQ-10, and SPQ-10 by sex and occupational category (STEM vs. non-STEM)**

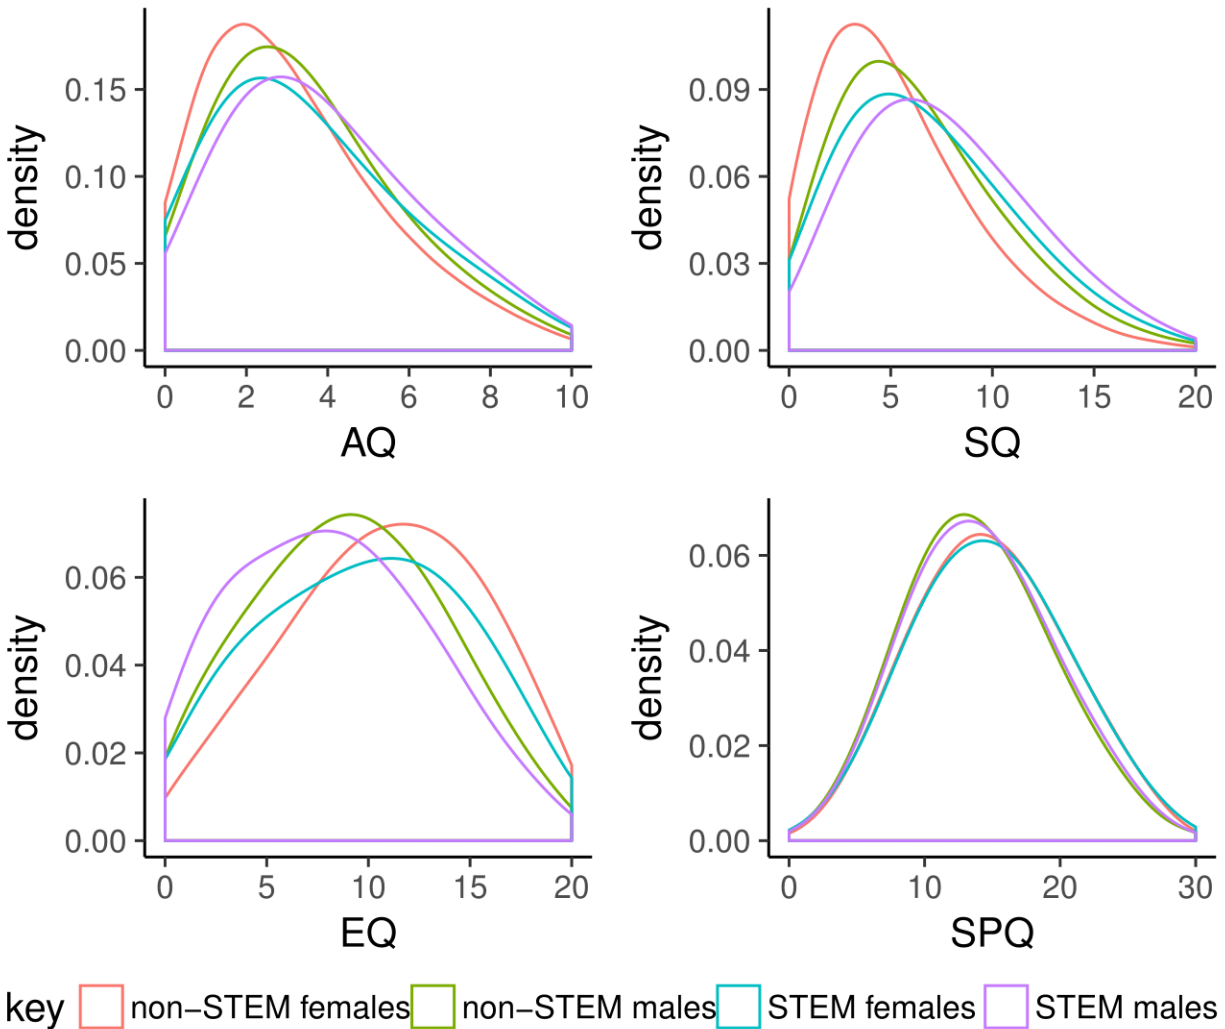

This Figure provides the smoothed density plots for all four measures. Each separate graph represents a measure, with scores on the measure provided on the X-axis. The density is provided on the Y-axis. Each coloured line represents a category based on STEM occupation and sex.

**Supplementary Tables S1 – S20**

**Table S1. Effect size attenuation for sex differences between cases and controls**

| AQ                              |          |          |          |          |
|---------------------------------|----------|----------|----------|----------|
|                                 | Estimate | SE       | T        | P-value  |
| (Intercept)                     | 3.570429 | 0.004629 | 771.342  | <2e-16   |
| Sex (females vs males)          | -0.40116 | 0.005879 | -68.234  | <2e-16   |
| Diagnosis (autism vs controls)  | 1.305203 | 0.017486 | 74.644   | <2e-16   |
| Sex (females):diagnosis(autism) | 0.189616 | 0.024475 | 7.747    | 9.40E-15 |
|                                 |          |          |          |          |
| EQ                              |          |          |          |          |
| (Intercept)                     | 8.875432 | 0.009806 | 905.12   | <2e-16   |
| Sex (females vs males)          | 1.921288 | 0.012455 | 154.26   | <2e-16   |
| Diagnosis (autism vs controls)  | -1.95494 | 0.037042 | -52.78   | <2e-16   |
| Sex (females):diagnosis(autism) | -0.5764  | 0.051848 | -11.12   | <2e-16   |
|                                 |          |          |          |          |
| SQ                              |          |          |          |          |
| (Intercept)                     | 6.734478 | 0.008193 | 822.012  | < 2e-16  |
| Sex (females vs males)          | -1.28412 | 0.010406 | -123.406 | < 2e-16  |
| Diagnosis (autism vs controls)  | 1.343375 | 0.030948 | 43.407   | < 2e-16  |
| Sex (females):diagnosis(autism) | 0.301009 | 0.043319 | 6.949    | 3.69E-12 |
|                                 |          |          |          |          |
| SPQ                             |          |          |          |          |
| (Intercept)                     | 13.99455 | 0.01159  | 1207.809 | <2e-16   |
| Sex (females vs males)          | 0.82741  | 0.01472  | 56.223   | <2e-16   |
| Diagnosis (autism vs controls)  | 2.336    | 0.04377  | 53.37    | <2e-16   |
| Sex (females):diagnosis(autism) | -0.05005 | 0.06126  | -0.817   | 0.414    |

**Table S2. Correlations between four measures and age in cases and controls**

|     | Controls                |                  |           | Cases                   |                  |           |
|-----|-------------------------|------------------|-----------|-------------------------|------------------|-----------|
|     | Correlation coefficient | 95%CI            | P         | Correlation coefficient | 95%CI            | P         |
| AQ  | -0.04                   | -0.043 to -0.038 | < 2.2e-16 | 0.116                   | 0.106 to 0.126   | < 2.2e-16 |
| EQ  | 0.055                   | 0.052 to 0.057   | < 2.2e-16 | -0.051                  | -0.061 to -0.040 | < 2.2e-16 |
| SQ  | 0.038                   | 0.035 to 0.040   | < 2.2e-16 | 0.135                   | 0.125 to 0.145   | < 2.2e-16 |
| SPQ | 0.1                     | 0.098 to 0.102   | < 2.2e-16 | 0.145                   | 0.135 to 0.155   | < 2.2e-16 |

**Table S3. Correlations between the four measures and education in cases and controls**

|     | Controls                |                  |           | Cases                   |                  |           |
|-----|-------------------------|------------------|-----------|-------------------------|------------------|-----------|
|     | Correlation coefficient | 95%CI            | P         | Correlation coefficient | 95%CI            | P         |
| AQ  | -0.09                   | -0.092 to -0.087 | < 2.2e-16 | -0.05                   | -0.060 to -0.039 | < 2.2e-16 |
| EQ  | 0.09                    | 0.097 to 0.102   | < 2.2e-16 | 0.084                   | 0.073 to 0.094   | < 2.2e-16 |
| SQ  | 0.01                    | 0.011 to 0.015   | < 2.2e-16 | 0.022                   | 0.011 to 0.032   | 2.52E-05  |
| SPQ | -0.07                   | -0.078 to -0.073 | < 2.2e-16 | -0.062                  | -0.072 to -0.052 | < 2.2e-16 |

**Table S4. Mean and SD for the four measures in cases and controls in different geographic regions**

| Sex  | Country/region                  | Measure | Mean      | SD       | SE of mean  |
|------|---------------------------------|---------|-----------|----------|-------------|
| Male | Prefer not to say               | AQ      | 3.555809  | 2.217204 | 0.020380817 |
| Male | Prefer not to say               | EQ      | 8.909675  | 4.660671 | 0.042841467 |
| Male | Prefer not to say               | SQ      | 7.034643  | 4.249624 | 0.039063069 |
| Male | Prefer not to say               | SPQ     | 13.899113 | 5.713688 | 0.052520931 |
| Male | Wales                           | AQ      | 3.678014  | 2.304777 | 0.025550341 |
| Male | Wales                           | EQ      | 8.701364  | 4.655015 | 0.051604659 |
| Male | Wales                           | SQ      | 6.80816   | 4.197841 | 0.046536514 |
| Male | Wales                           | SPQ     | 14.382205 | 5.602023 | 0.062103022 |
| Male | Scotland                        | AQ      | 3.514204  | 2.288172 | 0.017865442 |
| Male | Scotland                        | EQ      | 8.884967  | 4.707088 | 0.036751698 |
| Male | Scotland                        | SQ      | 6.532553  | 4.088394 | 0.031921103 |
| Male | Scotland                        | SPQ     | 13.976591 | 5.418908 | 0.042309406 |
| Male | Northern Ireland                | AQ      | 3.422964  | 2.169421 | 0.026304223 |
| Male | Northern Ireland                | EQ      | 9.206704  | 4.649885 | 0.056379853 |
| Male | Northern Ireland                | SQ      | 6.344458  | 4.00628  | 0.048576135 |
| Male | Northern Ireland                | SPQ     | 14.069685 | 5.551684 | 0.067314162 |
| Male | London                          | AQ      | 3.392052  | 2.210319 | 0.014566495 |
| Male | London                          | EQ      | 9.368686  | 4.790364 | 0.031569571 |
| Male | London                          | SQ      | 6.470445  | 4.068623 | 0.026813134 |
| Male | London                          | SPQ     | 13.723474 | 5.401337 | 0.035596022 |
| Male | North East                      | AQ      | 3.666165  | 2.307044 | 0.023120202 |
| Male | North East                      | EQ      | 8.627097  | 4.732503 | 0.047427109 |
| Male | North East                      | SQ      | 6.559707  | 4.119325 | 0.041282102 |
| Male | North East                      | SPQ     | 14.409862 | 5.579481 | 0.055915159 |
| Male | North West                      | AQ      | 3.655105  | 2.301231 | 0.017212234 |
| Male | North West                      | EQ      | 8.708084  | 4.762919 | 0.035624614 |
| Male | North West                      | SQ      | 6.63228   | 4.189441 | 0.03133524  |
| Male | North West                      | SPQ     | 14.344112 | 5.544213 | 0.041468363 |
| Male | Yorkshire and Humber (England)' | AQ      | 3.644531  | 2.29814  | 0.02027727  |
| Male | Yorkshire and Humber (England)' | EQ      | 8.542312  | 4.734909 | 0.041777702 |
| Male | Yorkshire and Humber (England)' | SQ      | 6.561386  | 4.125266 | 0.036398616 |
| Male | Yorkshire and Humber (England)' | SPQ     | 14.142468 | 5.4316   | 0.047924847 |
| Male | West Midlands (England)         | AQ      | 3.756762  | 2.317654 | 0.022117077 |
| Male | West Midlands (England)         | EQ      | 8.634551  | 4.773413 | 0.045552062 |
| Male | West Midlands (England)         | SQ      | 6.701211  | 4.132402 | 0.039434979 |
| Male | West Midlands (England)         | SPQ     | 14.355887 | 5.455376 | 0.052059951 |
| Male | East Midlands (England)         | AQ      | 3.780325  | 2.357122 | 0.021558838 |



|        |                                       |     |           |          |             |
|--------|---------------------------------------|-----|-----------|----------|-------------|
| Male   | East Midlands (England)               | EQ  | 8.421951  | 4.775612 | 0.043678968 |
| Male   | East Midlands (England)               | SQ  | 6.680107  | 4.10802  | 0.037573    |
| Male   | East Midlands (England)               | SPQ | 14.333863 | 5.453611 | 0.049880121 |
| Male   | South East (England)                  | AQ  | 3.645673  | 2.326185 | 0.013532336 |
| Male   | South East (England)                  | EQ  | 8.749061  | 4.811361 | 0.027989588 |
| Male   | South East (England)                  | SQ  | 6.578835  | 4.15807  | 0.024189141 |
| Male   | South East (England)                  | SPQ | 14.117906 | 5.45744  | 0.031748086 |
| Male   | South West (England)                  | AQ  | 3.660664  | 2.315577 | 0.017398061 |
| Male   | South West (England)                  | EQ  | 8.788077  | 4.781528 | 0.035925958 |
| Male   | South West (England)                  | SQ  | 6.707011  | 4.168076 | 0.031316793 |
| Male   | South West (England)                  | SPQ | 14.214689 | 5.509498 | 0.041395558 |
| Male   | Other (outside of the United Kingdom) | AQ  | 3.462366  | 2.236448 | 0.009029911 |
| Male   | Other (outside of the United Kingdom) | EQ  | 9.04682   | 4.740284 | 0.019139426 |
| Male   | Other (outside of the United Kingdom) | SQ  | 7.056292  | 4.27511  | 0.017261236 |
| Male   | Other (outside of the United Kingdom) | SPQ | 13.593942 | 5.542732 | 0.0223794   |
| Male   | Other (in the United Kingdom)         | AQ  | 3.628113  | 2.329412 | 0.043026727 |
| Male   | Other (in the United Kingdom)         | EQ  | 8.814739  | 4.758338 | 0.087891593 |
| Male   | Other (in the United Kingdom)         | SQ  | 6.757079  | 4.254652 | 0.078587977 |
| Male   | Other (in the United Kingdom)         | SPQ | 14.244285 | 5.673575 | 0.104797006 |
| Female | Prefer not to say                     | AQ  | 3.365892  | 2.200669 | 0.018219731 |
| Female | Prefer not to say                     | EQ  | 10.484406 | 4.676465 | 0.038717287 |
| Female | Prefer not to say                     | SQ  | 6.168826  | 4.020079 | 0.033282951 |
| Female | Prefer not to say                     | SPQ | 15.317705 | 5.880741 | 0.048687702 |
| Female | Wales                                 | AQ  | 3.256921  | 2.234406 | 0.017907365 |
| Female | Wales                                 | EQ  | 10.636778 | 4.780182 | 0.03831017  |
| Female | Wales                                 | SQ  | 5.469587  | 3.861338 | 0.030946212 |
| Female | Wales                                 | SPQ | 15.016058 | 5.757073 | 0.046139336 |
| Female | Scotland                              | AQ  | 3.099083  | 2.224074 | 0.01274986  |
| Female | Scotland                              | EQ  | 10.895856 | 4.793614 | 0.027480158 |
| Female | Scotland                              | SQ  | 5.239015  | 3.774402 | 0.021637362 |
| Female | Scotland                              | SPQ | 14.559269 | 5.720422 | 0.032793232 |
| Female | Northern Ireland                      | AQ  | 3.23207   | 2.171602 | 0.020651977 |
| Female | Northern Ireland                      | EQ  | 10.645745 | 4.72304  | 0.044916197 |
| Female | Northern Ireland                      | SQ  | 5.310844  | 3.790276 | 0.036045595 |
| Female | Northern Ireland                      | SPQ | 14.962648 | 5.83653  | 0.055505508 |
| Female | London                                | AQ  | 2.966434  | 2.15489  | 0.012120479 |
| Female | London                                | EQ  | 11.280806 | 4.846242 | 0.027258362 |
| Female | London                                | SQ  | 5.17881   | 3.714976 | 0.020895395 |
| Female | London                                | SPQ | 14.332469 | 5.664481 | 0.031860657 |
| Female | North East                            | AQ  | 3.228675  | 2.201043 | 0.016472086 |
| Female | North East                            | EQ  | 10.627779 | 4.799732 | 0.03592006  |
| Female | North East                            | SQ  | 5.23394   | 3.781354 | 0.028298757 |
| Female | North East                            | SPQ | 14.983758 | 5.707359 | 0.042712528 |
| Female | North West                            | AQ  | 3.197412  | 2.220658 | 0.012430764 |
| Female | North West                            | EQ  | 10.731739 | 4.852004 | 0.027160472 |
| Female | North West                            | SQ  | 5.211889  | 3.78198  | 0.021170709 |
| Female | North West                            | SPQ | 14.925767 | 5.696201 | 0.031886104 |
| Female | Yorkshire and Humber (England)        | AQ  | 3.225976  | 2.23534  | 0.01466404  |

|        |                                       |     |           |          |             |
|--------|---------------------------------------|-----|-----------|----------|-------------|
| Female | Yorkshire and Humber (England)        | EQ  | 10.561088 | 4.851676 | 0.031827441 |
| Female | Yorkshire and Humber (England)        | SQ  | 5.200585  | 3.735499 | 0.02450522  |
| Female | Yorkshire and Humber (England)        | SPQ | 14.766708 | 5.629981 | 0.0369332   |
| Female | West Midlands (England)               | AQ  | 3.185263  | 2.254703 | 0.015973938 |
| Female | West Midlands (England)               | EQ  | 10.712694 | 4.871172 | 0.034510883 |
| Female | West Midlands (England)               | SQ  | 5.255032  | 3.785783 | 0.02682121  |
| Female | West Midlands (England)               | SPQ | 14.990714 | 5.721726 | 0.040536818 |
| Female | East Midlands (England)               | AQ  | 3.203944  | 2.264893 | 0.015077523 |
| Female | East Midlands (England)               | EQ  | 10.669754 | 4.933196 | 0.03284057  |
| Female | East Midlands (England)               | SQ  | 5.196277  | 3.765388 | 0.025066405 |
| Female | East Midlands (England)               | SPQ | 14.899047 | 5.688854 | 0.037871029 |
| Female | South East (England)                  | AQ  | 3.062481  | 2.235743 | 0.009521387 |
| Female | South East (England)                  | EQ  | 11.010283 | 4.921082 | 0.020957479 |
| Female | South East (England)                  | SQ  | 5.070225  | 3.743741 | 0.015943522 |
| Female | South East (England)                  | SPQ | 14.765892 | 5.727821 | 0.024393149 |
| Female | South West (England)                  | AQ  | 3.13666   | 2.237438 | 0.012650388 |
| Female | South West (England)                  | EQ  | 10.919698 | 4.888751 | 0.027640802 |
| Female | South West (England)                  | SQ  | 5.222332  | 3.76813  | 0.021304855 |
| Female | South West (England)                  | SPQ | 14.826705 | 5.714171 | 0.032307698 |
| Female | Other (outside of the United Kingdom) | AQ  | 3.233928  | 2.234247 | 0.007762388 |
| Female | Other (outside of the United Kingdom) | EQ  | 10.696932 | 4.825975 | 0.016766764 |
| Female | Other (outside of the United Kingdom) | SQ  | 6.178089  | 4.126008 | 0.014334888 |
| Female | Other (outside of the United Kingdom) | SPQ | 14.851616 | 5.838423 | 0.02028429  |
| Female | Other (in the United Kingdom)         | AQ  | 3.311537  | 2.225395 | 0.029785994 |
| Female | Other (in the United Kingdom)         | EQ  | 10.463812 | 4.857625 | 0.065017323 |
| Female | Other (in the United Kingdom)         | SQ  | 5.539233  | 3.819782 | 0.051126223 |
| Female | Other (in the United Kingdom)         | SPQ | 15.206198 | 5.802638 | 0.077665933 |

**Table S5. Mean and SD for the four measures in cases and controls based on STEM groups**

| sex     | STEM     | Measure | Mean      | SD       | SEM         |
|---------|----------|---------|-----------|----------|-------------|
| Males   | Non-STEM | AQ      | 3.489074  | 2.247115 | 0.005162604 |
| Males   | Non-STEM | EQ      | 9.069335  | 4.729977 | 0.010866822 |
| Males   | Non-STEM | SQ      | 6.467117  | 4.096856 | 0.009412267 |
| Males   | Non-STEM | SPQ     | 13.952211 | 5.522411 | 0.01268739  |
| Males   | STEM     | AQ      | 3.867619  | 2.367948 | 0.010395341 |
| Males   | STEM     | EQ      | 8.167322  | 4.784522 | 0.021004151 |
| Males   | STEM     | SQ      | 7.711205  | 4.333073 | 0.019022278 |
| Males   | STEM     | SPQ     | 14.149746 | 5.489321 | 0.02409823  |
| Females | Non-STEM | AQ      | 3.149478  | 2.216301 | 0.003627252 |
| Females | Non-STEM | EQ      | 10.849338 | 4.831171 | 0.00790681  |
| Females | Non-STEM | SQ      | 5.371773  | 3.839555 | 0.006283908 |
| Females | Non-STEM | SPQ     | 14.820487 | 5.752781 | 0.009415139 |
| Females | STEM     | AQ      | 3.534249  | 2.383149 | 0.016747479 |
| Females | STEM     | EQ      | 9.826609  | 5.072695 | 0.035648145 |
| Females | STEM     | SQ      | 6.900044  | 4.269444 | 0.030003338 |
| Females | STEM     | SPQ     | 14.850363 | 5.649177 | 0.039699353 |

**Table S6. Regression beta and standard error for STEM as a predictor variable for the four measures**

|     | Estimate | Std. Error | P       |
|-----|----------|------------|---------|
| AQ  | 0.456418 | 0.009172   | < 2e-16 |
| EQ  | -1.10613 | 0.019208   | < 2e-16 |
| SQ  | 1.271958 | 0.016184   | < 2e-16 |
| SPQ | 0.248152 | 0.022987   | < 2e-16 |

**Table S7. Regressions predicting AQ in controls**

|                                       | Model 1  |      |         |         | Model 2  |      |         |         | Model 3  |      |         |         |
|---------------------------------------|----------|------|---------|---------|----------|------|---------|---------|----------|------|---------|---------|
|                                       | Estimate | SE   | t value | P       | Estimate | SE   | t value | P       | Estimate | SE   | t value | P       |
| (intercept)                           | 5.16     | 0.10 | 49.36   | < 2e-16 | 3.82     | 0.08 | 48.19   | < 2e-16 | 3.30     | 0.08 | 41.76   | < 2e-16 |
| handedness (Right-handed)             | -1.02    | 0.10 | -9.86   | < 2e-16 | -0.29    | 0.08 | -3.71   | 0.00    | -0.28    | 0.08 | -3.59   | 0.00    |
| handedness (Left-handed)              | -0.96    | 0.10 | -9.23   | < 2e-16 | -0.28    | 0.08 | -3.55   | 0.00    | -0.27    | 0.08 | -3.39   | 0.00    |
| handedness (Ambidextrous)             | -0.36    | 0.10 | -3.48   | 0.00    | -0.21    | 0.08 | -2.70   | 0.01    | -0.28    | 0.08 | -3.54   | 0.00    |
| Sex (female)                          | -0.29    | 0.01 | 48.14   | < 2e-16 | 0.31     | 0.00 | 65.79   | < 2e-16 | 0.24     | 0.00 | 51.86   | < 2e-16 |
| country/region (Wales)                | 0.07     | 0.02 | 3.49    | 0.00    | 0.15     | 0.02 | 9.57    | < 2e-16 | 0.14     | 0.02 | 9.09    | < 2e-16 |
| country/region (South East (England)) | -0.07    | 0.02 | -4.21   | 0.00    | 0.15     | 0.01 | 12.26   | < 2e-16 | 0.14     | 0.01 | 12.11   | < 2e-16 |
| country/region (South West (England)) | -0.03    | 0.02 | -1.55   | 0.12    | 0.15     | 0.01 | 11.40   | < 2e-16 | 0.14     | 0.01 | 11.07   | < 2e-16 |

|                                                        |       |      |        |         |       |      |       |         |       |      |       |         |
|--------------------------------------------------------|-------|------|--------|---------|-------|------|-------|---------|-------|------|-------|---------|
|                                                        |       |      |        |         |       |      |       | 16      |       |      |       | 16      |
| country/region (Other (outside of the United Kingdom)) | -0.03 | 0.02 | -1.78  | 0.07    | -0.02 | 0.01 | -2.12 | 0.03    | -0.02 | 0.01 | -1.35 | 0.18    |
| country/region (Other (in the United Kingdom))         | 0.04  | 0.03 | 1.55   | 0.12    | 0.12  | 0.02 | 5.62  | 0.00    | 0.11  | 0.02 | 5.35  | 0.00    |
| country/region (Scotland)                              | -0.09 | 0.02 | -5.39  | 0.00    | 0.09  | 0.01 | 6.67  | 0.00    | 0.09  | 0.01 | 6.72  | 0.00    |
| country/region (Northern Ireland)                      | -0.06 | 0.02 | -2.98  | 0.00    | 0.10  | 0.02 | 6.19  | 0.00    | 0.09  | 0.02 | 5.36  | 0.00    |
| country/region (London (England))                      | -0.17 | 0.02 | -10.12 | < 2e-16 | 0.08  | 0.01 | 6.13  | 0.00    | 0.08  | 0.01 | 6.20  | 0.00    |
| country/region (North East (England))                  | 0.02  | 0.02 | 1.30   | 0.19    | 0.15  | 0.01 | 10.61 | < 2e-16 | 0.14  | 0.01 | 9.86  | < 2e-16 |
| country/region (North West (England))                  | 0.03  | 0.02 | 1.72   | 0.09    | 0.16  | 0.01 | 12.73 | < 2e-16 | 0.15  | 0.01 | 11.98 | < 2e-16 |
| country/region (Yorkshire and Humber (England))        | 0.04  | 0.02 | 1.96   | 0.05    | 0.14  | 0.01 | 10.27 | < 2e-16 | 0.14  | 0.01 | 10.15 | < 2e-16 |
| country/region (West Midlands (England))               | 0.05  | 0.02 | 2.67   | 0.01    | 0.18  | 0.01 | 12.30 | < 2e-16 | 0.17  | 0.01 | 11.75 | < 2e-16 |
| country/region (East Midlands (England))               | 0.06  | 0.02 | 3.00   | 0.00    | 0.18  | 0.01 | 12.84 | < 2e-16 | 0.17  | 0.01 | 12.60 | < 2e-16 |

|           |              |      |       |                |               |      |        |                |               |      |        |                |
|-----------|--------------|------|-------|----------------|---------------|------|--------|----------------|---------------|------|--------|----------------|
| education | -0.22        | 0.00 | 70.51 | <<br>2e-<br>16 | -0.11         | 0.00 | -46.83 | <<br>2e-<br>16 | -0.10         | 0.00 | -40.82 | <<br>2e-<br>16 |
| age       | 0.00         | 0.00 | 17.88 | <<br>2e-<br>16 | -0.01         | 0.00 | -39.27 | <<br>2e-<br>16 | -0.01         | 0.00 | -48.31 | <<br>2e-<br>16 |
| STEM      | 0.46         | 0.01 | 49.76 | <<br>2e-<br>16 | -0.06         | 0.01 | -8.30  | <<br>2e-<br>16 | -0.04         | 0.01 | -5.28  | 0.00           |
| D-score   |              |      |       |                | 4.31          | 0.01 | 684.29 | <<br>2e-<br>16 | 4.05          | 0.01 | 592.71 | <<br>2e-<br>16 |
| SPQ       |              |      |       |                |               |      |        |                | 0.04          | 0.00 | 94.31  | <<br>2e-<br>16 |
|           | $r^2 = .023$ |      |       |                | $r^2 = 0.437$ |      |        |                | $r^2 = 0.445$ |      |        |                |

*This Table reports the results of three-regression models with scores on the AQ-10 as the dependent variable. In the first model, demographics including sex, handedness, age, education, and geographical location have been included. In the second model, additionally, D-scores have been included. In the third model, additionally, scores on the SPQ have been included. None of the variables have been standardized. Estimate is the regression coefficient, SE is the standard error of the regression coefficient, and P is the associated P-value. The variance explained is provided at the bottom ( $r^2$ ). Several variables (sex, handedness, STEM degree, and country/region) have been coded as categorical variables. For country-region and handedness, this included a 'prefer not to say' option and this too has been included as a categorical variable. Regression coefficients are provided for the category in parenthesis in comparison with another category. For sex, the comparison is males, for handedness the comparison is 'prefer not to say', for STEM degree, it is non-STEM degree, and for country/region, it is 'prefer not to say'. We included 'prefer not to say' as a category as it may be a non-random choice. Continuous variables like education, age, D-score and SPQ, have been coded from lower to higher values. Negative betas suggest a negative correlation between the continuous variable and the AQ and vice versa. Lower D-scores indicate higher scores on the EQ compared to the SQ.*

**Table S8. AQ and SPQ scores for the four brain types**

| Brain type     | Category | Mean     | Standard deviation | Standard error of mean |
|----------------|----------|----------|--------------------|------------------------|
| Extreme Type E | AQ       | 0.991822 | 1.002425           | 0.008723               |
| Type E         | AQ       | 1.935857 | 1.432427           | 0.003089               |
| Type B         | AQ       | 3.107094 | 1.744665           | 0.00398                |
| Type S         | AQ       | 4.857365 | 2.135523           | 0.004801               |
| Extreme Type S | AQ       | 7.298873 | 1.953192           | 0.015125               |
|                |          |          |                    |                        |
| Brain type     | Category | Mean     | Standard deviation | Standard error of mean |
| Extreme Type E | SPQ      | 10.36332 | 5.345941           | 0.04652                |
| Type E         | SPQ      | 12.53279 | 5.241795           | 0.011302               |
| Type B         | SPQ      | 14.28662 | 5.244543           | 0.011965               |
| Type S         | SPQ      | 16.6333  | 5.410782           | 0.012165               |
| Extreme Type S | SPQ      | 20.58449 | 5.469007           | 0.042351               |

**Table S9. Mean EQ and SQ scores in the validation dataset**

| Category          | Variable | Mean         | SD            | SEM            | N    | Cohen's D (sex, cases)    |                          |
|-------------------|----------|--------------|---------------|----------------|------|---------------------------|--------------------------|
| Autism (females)  | EQ       | 28.724<br>14 | 12.8901<br>35 | 1.381967<br>5  | 87   | 0.21                      |                          |
| Autism (males)    | EQ       | 26.129<br>5  | 11.3596<br>25 | 0.963510<br>82 | 139  |                           |                          |
| Autism (females)  | SQ       | 17.091<br>95 | 4.39246<br>8  | 0.470921<br>96 | 87   | 0.23                      |                          |
| Autism (males)    | SQ       | 16.086<br>33 | 4.03693<br>5  | 0.342408<br>32 | 139  |                           |                          |
|                   |          |              |               |                |      |                           |                          |
| Category          | Variable | Mean         | SD            | SEM            | N    | Cohen's D (sex, controls) | Cohen's D (case-control) |
| Control (females) | EQ       | 44.143<br>28 | 12.5438<br>86 | 0.142195<br>71 | 7782 | 0.53                      | 1.21                     |
| Control (males)   | EQ       | 37.650<br>15 | 11.8811<br>01 | 0.149250<br>18 | 6337 |                           | 0.99                     |
| Control (females) | SQ       | 15.309<br>95 | 4.04092<br>3  | 0.045807<br>33 | 7782 | 0.199                     | 0.42                     |
| Control (males)   | SQ       | 16.082<br>37 | 3.68673<br>5  | 0.046312<br>7  | 6337 |                           | 0.001                    |

**Table S10. Brain type by sex in the validation dataset**

| Brain type     | Control Males | Control Females | Autistic Males | Autistic Females |
|----------------|---------------|-----------------|----------------|------------------|
| Extreme Type S | 3.85          | 1.81            | 20.86          | 18.39            |
| Type S         | 41.07         | 23.83           | 56.83          | 60.91            |
| Type B         | 32.17         | 28.72           | 15.1           | 10.34            |
| Type E         | 22.43         | 42.31           | 7.19           | 10.34            |
| Extreme Type E | 0.45          | 3.31            | 0              | 0                |



**Table S11. Discrimination Index for the EQ-10 items**

|                                                                                                             | <b>DI (%)</b> |
|-------------------------------------------------------------------------------------------------------------|---------------|
| 35. I can easily work out what another person might want to talk about.                                     | .45           |
| 12. It is hard for me to see why some things upset people so much.                                          | .42           |
| 22. Other people tell me I am good at understanding how they are feeling and what they are thinking.        | .42           |
| 18. I can't always see why someone should have felt offended by a remark.                                   | .41           |
| 34. I can tune into how someone else feels rapidly and intuitively.                                         | .41           |
| 14. I am good at predicting how someone will feel.                                                          | .39           |
| 4. I find it hard to know what to do in a social situation.                                                 | .37           |
| 9. In a conversation, I tend to focus on my own thoughts rather than on what my listener might be thinking. | .37           |
| 31. Other people often say that I am insensitive, though I don't always see why.                            | .37           |
| 28. Friends usually talk to me about their problems as they say that I am very understanding.               | .36           |

**Table S12. Correlations between brief and long forms of the EQ**

|           | EQ-40  | EQ-22  | EQ-10  |
|-----------|--------|--------|--------|
| EQ-40     | 1      | .954** | .935** |
| EQ-22     | .954** | 1      | .959** |
| EQ-10     | .935** | .959** | 1      |
| n = 2,968 |        |        |        |

**Table S13. Discrimination Index for the SQ-R-10 items**

| <b>Item</b>                                                                                                                                    | <b>DI (%)</b> |
|------------------------------------------------------------------------------------------------------------------------------------------------|---------------|
| 32. When I learn about a new category I like to go into detail to understand the small differences between different members of that category. | 43.3          |
| 16. When I'm in a plane, I do not think about the aerodynamics.                                                                                | 39.3          |
| 27. I am interested in knowing the path a river takes from its source to the sea.                                                              | 39.2          |
| 9. When travelling by train, I often wonder exactly how the rail networks are coordinated.                                                     | 38.1          |
| 30. When I hear the weather forecast, I am not very interested in the meteorological patterns                                                  | 33.8          |
| 33. I enjoy looking through catalogues of products to see the details of each product and how it compares to others                            | 33.7          |
| 12. When I look at a mountain, I think about how precisely it was formed                                                                       | 33.5          |
| 25. When I look at a piece of furniture, I do not notice the details of how it was constructed.                                                | 32.2          |
| 8. When I learn a language, I become intrigued by its grammatical rules                                                                        | 32.1          |
| 7. When I listen to a piece of music, I always notice the way it's structured.                                                                 | 31.5          |

**Table S14. Correlations between brief and long forms of the SQ-R**

|           | SQ-75  | SQ-44  | SQ-10  |
|-----------|--------|--------|--------|
| SQ-75     | 1      | .936** | .830** |
| SQ-44     | .936** | 1      | .867** |
| SQ-10     | .830** | .867** | 1      |
| n = 2,774 |        |        |        |

**Table S15. Discrimination Index for SPQ-10 items**

| Item | Subscale | Item                                                                                                                            | DI% |
|------|----------|---------------------------------------------------------------------------------------------------------------------------------|-----|
| 62   | smell    | I would be able to smell the smallest gas leak from anywhere in the house.                                                      | .41 |
| 58   | taste    | I would be able to taste the difference between apparently identical pieces of candy.                                           | .39 |
| 88   | vision   | I can see dust particles in the air in most environments.                                                                       | .39 |
| 2    | smell    | I would be able to distinguish different people by their smell.                                                                 | .38 |
| 73   | hearing  | I would be the first to hear if there was a fly in the room.                                                                    | .35 |
| 74   | vision   | If I look at a pile of blue sweaters in a shop that are meant to be identical, I would be able to see differences between them. | .33 |
| 38   | touch    | I would be able to tell the weight difference between two different coin sizes on the palm of my hand, if my eyes were closed.  | .33 |
| 35   | touch    | I would be able to notice a tiny change (for example, 1 degree) in the temperature of the weather.                              | .33 |
| 32   | hearing  | I can hear electricity humming in the walls.                                                                                    | .30 |
| 21   | taste    | I would be able to taste the difference between two brands of salty potato chips/crisps.                                        | .21 |

**Table S16. Correlations between brief and long forms of the SPQ**

|           | SPQ-92 | SPQ-35 | SPQ-10 |
|-----------|--------|--------|--------|
| SPQ-92    | 1      | .934** | .828** |
| SPQ-35    | .934** | 1      | .920** |
| SPQ-10    | .828** | .920** | 1      |
| n = 1,711 |        |        |        |

**Table S17: The Empathy Quotient-10 (EQ-10)**

|     |                                                                                                          | strongly agree | slightly agree | slightly disagree | strongly disagree |
|-----|----------------------------------------------------------------------------------------------------------|----------------|----------------|-------------------|-------------------|
| 1.  | I am good at predicting how someone will feel.                                                           | 2              | 1              | 0                 | 0                 |
| 2.  | Other people tell me I am good at understanding how they are feeling and what they are thinking.         | 2              | 1              | 0                 | 0                 |
| 3.  | It is hard for me to see why some things upset people so much.                                           | 0              | 0              | 1                 | 2                 |
| 4.  | I can easily work out what another person might want to talk about.                                      | 2              | 1              | 0                 | 0                 |
| 5.  | I can't always see why someone should have felt offended by a remark.                                    | 0              | 0              | 1                 | 2                 |
| 6.  | I can tune into how someone else feels rapidly and intuitively.                                          | 2              | 1              | 0                 | 0                 |
| 7.  | Other people often say that I am insensitive, though I don't always see why.                             | 0              | 0              | 1                 | 2                 |
| 8.  | In a conversation, I tend to focus on my own thoughts rather than on what my listener might be thinking. | 0              | 0              | 1                 | 2                 |
| 9.  | Friends usually talk to me about their problems as they say that I am very understanding.                | 2              | 1              | 0                 | 0                 |
| 10. | I find it hard to know what to do in a social situation.                                                 | 0              | 0              | 1                 | 2                 |

**Table S18: The Systemizing Quotient-Revised-10 (SQ-R-10)**

|     |                                                                                                                                            | strongly agree | slightly agree | slightly disagree | strongly disagree |
|-----|--------------------------------------------------------------------------------------------------------------------------------------------|----------------|----------------|-------------------|-------------------|
| 1.  | When I learn about a new category I like to go into detail to understand the small differences between different members of that category. | 2              | 1              | 0                 | 0                 |
| 2.  | When I'm in a plane, I do not think about the aerodynamics.                                                                                | 0              | 0              | 1                 | 2                 |
| 3.  | I am interested in knowing the path a river takes from its source to the sea.                                                              | 2              | 1              | 0                 | 0                 |
| 4.  | When travelling by train, I often wonder exactly how the rail networks are coordinated.                                                    | 2              | 1              | 0                 | 0                 |
| 5.  | When I hear the weather forecast, I am not very interested in the meteorological patterns.                                                 | 0              | 0              | 1                 | 2                 |
| 6.  | I enjoy looking through catalogues of products to see the details of each product and how it compares to others.                           | 2              | 1              | 0                 | 0                 |
| 7.  | When I look at a mountain, I think about how precisely it was formed.                                                                      | 2              | 1              | 0                 | 0                 |
| 8.  | When I look at a piece of furniture, I do not notice the details of how it was constructed.                                                | 0              | 0              | 1                 | 2                 |
| 9.  | When I learn a language, I become intrigued by its grammatical rules.                                                                      | 2              | 1              | 0                 | 0                 |
| 10. | When I listen to a piece of music, I always notice the way it's structured.                                                                | 2              | 1              | 0                 | 0                 |

**Table S19: The Sensory Perception Quotient-10 (SPQ-10)**

|     |                                                                                                                                 | strongly agree | slightly agree | slightly disagree | strongly disagree |
|-----|---------------------------------------------------------------------------------------------------------------------------------|----------------|----------------|-------------------|-------------------|
| 1.  | I would be able to distinguish different people by their smell.                                                                 | 3              | 2              | 1                 | 0                 |
| 2.  | I would be able to taste the difference between two brands of salty potato chips/crisps.                                        | 3              | 2              | 1                 | 0                 |
| 3.  | I can hear electricity humming in the walls.                                                                                    | 3              | 2              | 1                 | 0                 |
| 4.  | I would be able to notice a tiny change (for example, 1 degree) in the temperature of the weather.                              | 3              | 2              | 1                 | 0                 |
| 5.  | I would be able to taste the difference between apparently identical pieces of candy.                                           | 3              | 2              | 1                 | 0                 |
| 6.  | I would be able to tell the weight difference between two different coin sizes on the palm of my hand, if my eyes were closed.  | 3              | 2              | 1                 | 0                 |
| 7.  | I would be able to smell the smallest gas leak from anywhere in the house.                                                      | 3              | 2              | 1                 | 0                 |
| 8.  | I would be the first to hear if there was a fly in the room.                                                                    | 3              | 2              | 1                 | 0                 |
| 9.  | If I look at a pile of blue sweaters in a shop that are meant to be identical, I would be able to see differences between them. | 3              | 2              | 1                 | 0                 |
| 10. | I can see dust particles in the air in most environments.                                                                       | 3              | 2              | 1                 | 0                 |

**Table S20: Autism Spectrum Quotient-10 (AQ-10)**

|     |                                                                                                                                  | definitely agree | slightly agree | slightly disagree | definitely disagree |
|-----|----------------------------------------------------------------------------------------------------------------------------------|------------------|----------------|-------------------|---------------------|
| 1.  | I often notice small sounds when others do not                                                                                   | 1                | 1              | 0                 | 0                   |
| 2.  | I usually concentrate more on the whole picture, rather than the small details.                                                  | 0                | 0              | 1                 | 1                   |
| 3.  | I find it easy to do more than one thing at once.                                                                                | 0                | 0              | 1                 | 1                   |
| 4.  | If there is an interruption, I can switch back to what I was doing very quickly.                                                 | 0                | 0              | 1                 | 1                   |
| 5.  | I find it easy to 'read between the lines' when someone is talking to me.                                                        | 0                | 0              | 1                 | 1                   |
| 6.  | I know how to tell if someone listening to me is getting bored.                                                                  | 0                | 0              | 1                 | 1                   |
| 7.  | When I'm reading a story I find it difficult to work out the characters' intentions.                                             | 1                | 1              | 0                 | 0                   |
| 8.  | I like to collect information about categories of things (e.g. types of car, types of bird, types of train, types of plant etc). | 1                | 1              | 0                 | 0                   |
| 9.  | I find it easy to work out what someone is thinking or feeling just by looking at their face.                                    | 0                | 0              | 1                 | 1                   |
| 10. | I find it difficult to work out people's intentions.                                                                             | 1                | 1              | 0                 | 0                   |
